# Supplementary material for: mGPfusion: predicting protein stability changes with Gaussian process kernel learning and data fusion
Source: Oxford University Press journal article supplement (doi:10.1093/bioinformatics/bty238), 2018-04-12
Supplement: bty238_jokinen.152.sup.1.pdf [file bty238_jokinen.152.sup.1.pdf]

## SUPPLEMENTARY MATERIAL

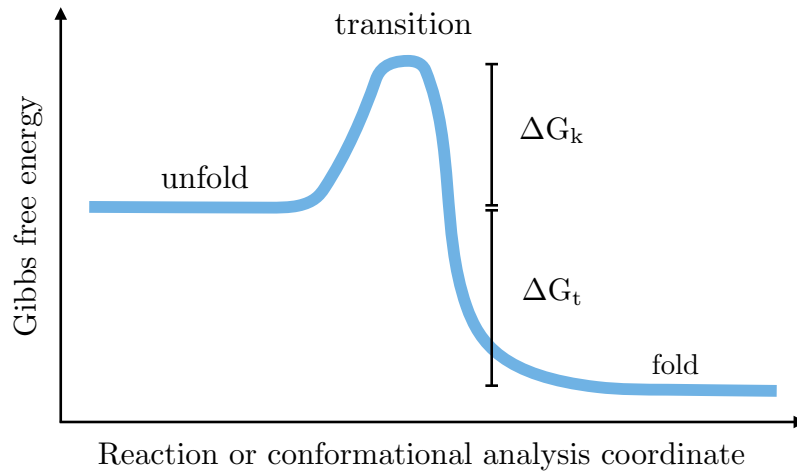

**Fig. S1.** The stability of a protein is determined by the thermodynamic and kinetic stabilities,  $\Delta G_t$  and  $\Delta G_k$ , respectively. We only consider the thermodynamic stability.

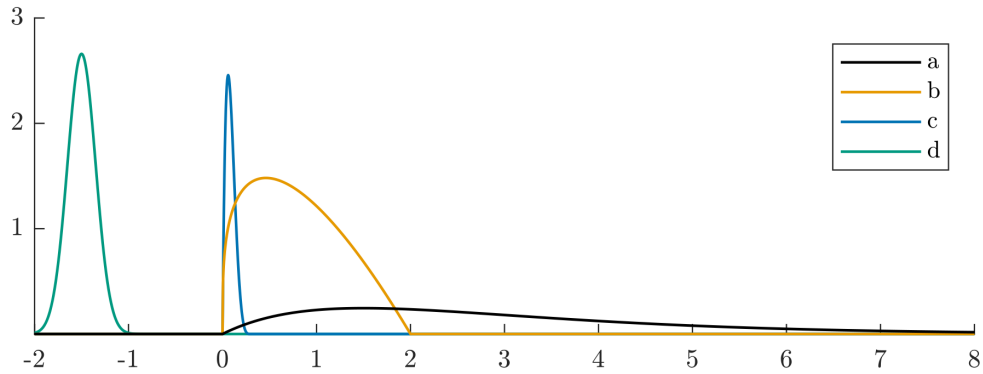

**Fig. S2.** Priors presented by Equation 2. Here  $\mu_d = -1.5$ , the most likely value for  $-a$ . Other hyperparameter values are presented in Table S1.

**Table S1.** Values for the hyperparameters used in the priors of  $a$ ,  $b$ ,  $c$ ,  $d$ ,  $\sigma_E$  and  $\sigma_S$  presented in Equations 2 and 6, respectively.

| $a$             | $b$              | $c$            | $d$               | $\sigma_E$       | $\sigma_S$        |
|-----------------|------------------|----------------|-------------------|------------------|-------------------|
| $\alpha_a = 2$  | $\alpha_b = 1.3$ | $\alpha_c = 2$ | $\mu_d = -a$      | $\alpha_E = 2.5$ | $\alpha_S = 50$   |
| $\beta_a = 1.5$ | $\beta_b = 2$    | $\beta_c = 5$  | $\sigma_d = 0.15$ | $\beta_E = 0.02$ | $\beta_S = 0.007$ |

The partial derivatives of the marginal likelihood with respect to the parameters  $\phi$  are obtained from Equation (9) as follows:

$$\begin{aligned}\frac{\partial}{\partial \phi_j} \log p(\mathbf{y}|X, \phi) &= \frac{1}{2} \mathbf{y}^T K_\phi^{-1} \frac{\partial K_\phi}{\partial \phi_j} K_\phi^{-1} \mathbf{y} - \frac{1}{2} \text{tr} \left( K_\phi^{-1} \frac{\partial K_\phi}{\partial \phi_j} \right) \\ &= \frac{1}{2} \text{tr} \left( \left( \boldsymbol{\alpha} \boldsymbol{\alpha}^T - K_\phi^{-1} \right) \frac{\partial K_\phi}{\partial \theta_j} \right),\end{aligned}\quad (\text{S1})$$

where  $\boldsymbol{\alpha} = K_\phi^{-1} \mathbf{y}$ ,  $K_\phi$  is determined as

$$K_\phi = \sum_{m=1}^M w_m K_m^{\gamma_m} + \text{diag} \begin{pmatrix} \sigma_0 & & \\ & \sigma_E \mathbf{1}_{N_E} & \\ & & \sigma_E \mathbf{1}_{N_E} + \sigma_S \mathbf{1}_{N_S} + t \boldsymbol{\sigma}_T \end{pmatrix}^2$$

and the partial derivatives of  $K_\phi$  with respect to the optimised parameters are

$$\frac{\partial K_\phi}{\partial \sigma_E} = \text{diag} \begin{pmatrix} 0 & & \\ & 2\sigma_E \mathbf{1}_{N_E} & \\ & & 2(\sigma_E \mathbf{1}_{N_E} + \sigma_S \mathbf{1}_{N_S} + t \boldsymbol{\sigma}_T) \end{pmatrix} \quad (\text{S2})$$

$$\frac{\partial K_\phi}{\partial \sigma_R} = \text{diag} \begin{pmatrix} 0 & & \\ & \mathbf{0}_{N_E} & \\ & & 2(\sigma_E \mathbf{1}_{N_E} + \sigma_S \mathbf{1}_{N_S} + t \boldsymbol{\sigma}_T) \end{pmatrix} \quad (\text{S3})$$

$$\frac{\partial K_\phi}{\partial t} = \text{diag} \begin{pmatrix} 0 & & \\ & \mathbf{0}_{N_E} & \\ & & 2(\sigma_E \mathbf{1}_{N_E} + \sigma_S \mathbf{1}_{N_S} + t) \boldsymbol{\sigma}_T \end{pmatrix} \quad (\text{S4})$$

$$\frac{\partial K_\phi}{\partial w_m} = K_m^{\gamma_m} \quad (\text{S5})$$

$$\frac{\partial K_\phi}{\partial \gamma_m} = w_m K_m^{\gamma_m} \log K_m \quad (\text{S6})$$

Correlation  $\rho$  and root-mean-square error rmse for the predictions are determined as

$$\rho = \frac{\sum_{i=1}^{N_*} (y_i - \bar{y})(\mu(\mathbf{x}_i) - \bar{\mu})}{\sqrt{\sum_{i=1}^{N_*} (y_i - \bar{y})^2 \sum_{i=1}^{N_*} (\mu(\mathbf{x}_i) - \bar{\mu})^2}} \quad (\text{S7})$$

$$\text{rmse} = \sqrt{\frac{1}{N_*} \sum_{i=1}^{N_*} (y_i - \mu(\mathbf{x}_i))^2}, \quad (\text{S8})$$

where  $\bar{y}$  is the mean of the experimentally measured values,  $\mu(\mathbf{x}_i)$  is prediction mean,  $\bar{\mu}$  is the average of all prediction means, and  $N_*$  is the number of predictions.

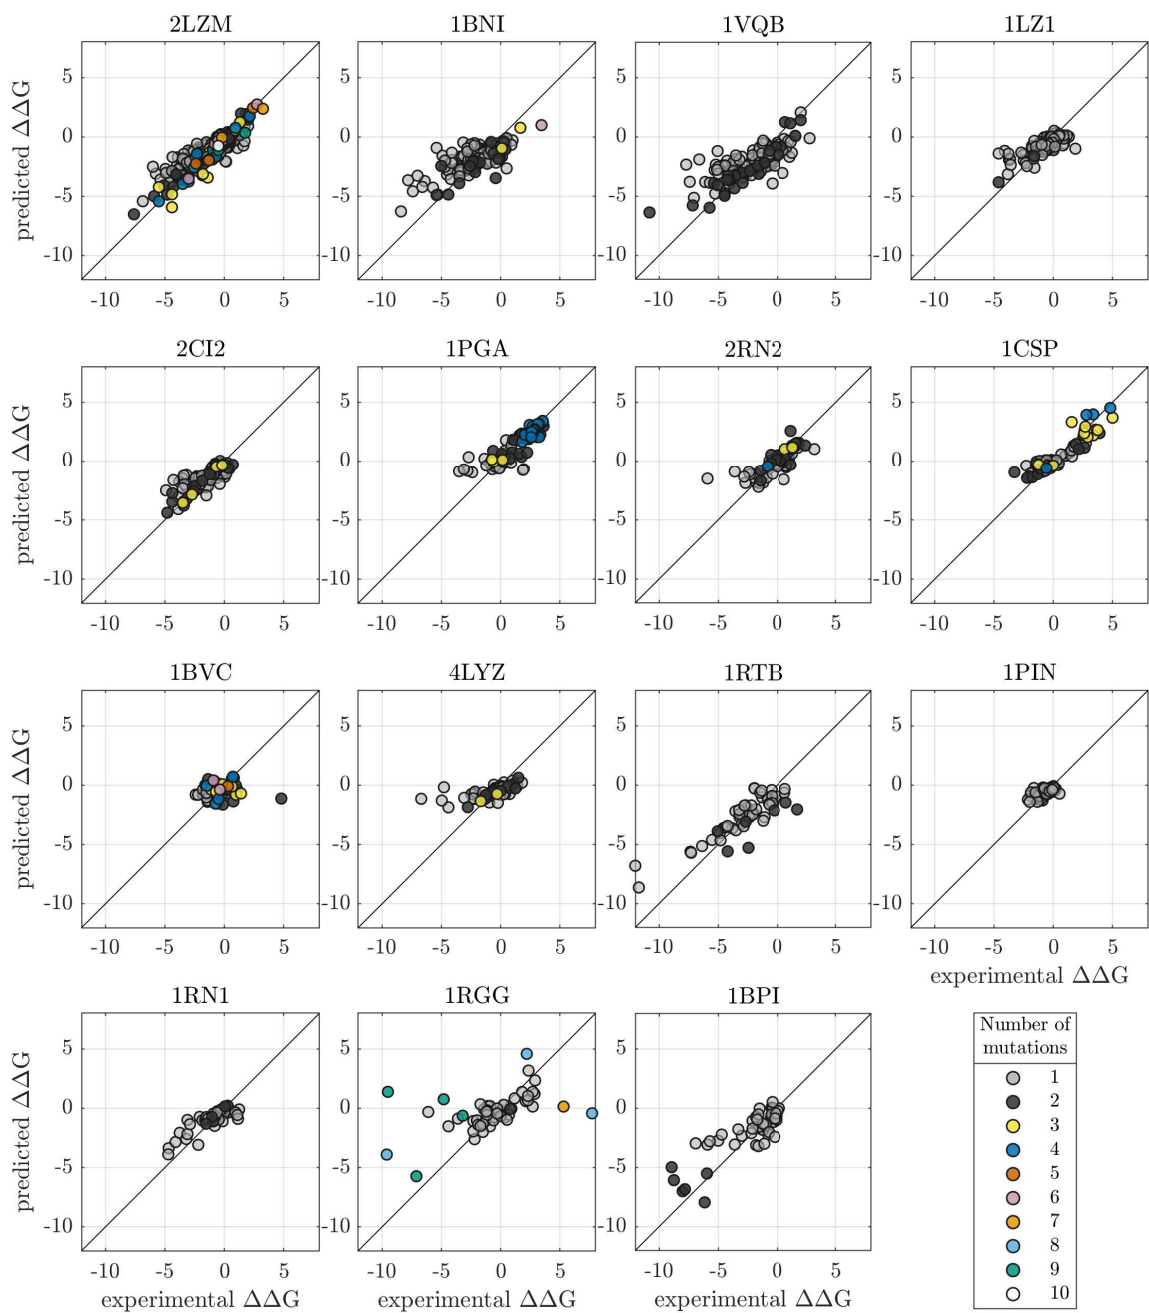

Fig. S3. Mutation-level predictions for all 15 proteins presented in Table 1. The predictions are coloured by the number of simultaneous mutations.

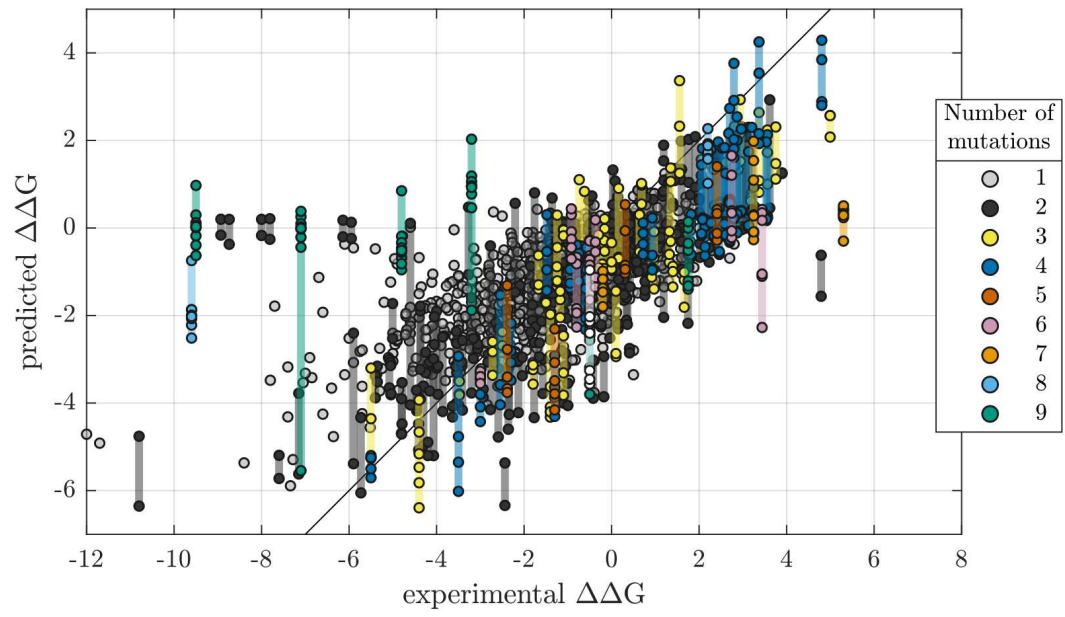

**Fig. S4.** Position-level predictions for all 15 proteins. When the effects of a mutant are predicted multiple times, they are connected by a line.

Table S2. (Continues on the next page) Comparison of different methods on the 15 protein dataset with respect to  $\rho$  and rmse. Off-the-shelf implementations of Rosetta, mCSM and PoPMuSiC are used directly without cross-validation.

| Protein | Method              | Correlation $\rho$     |       |      |                        |       |       |                        |       |      | rmse                   |      |      |                        |      |      |                        |      |      |       |
|---------|---------------------|------------------------|-------|------|------------------------|-------|-------|------------------------|-------|------|------------------------|------|------|------------------------|------|------|------------------------|------|------|-------|
|         |                     | Point mutations        |       |      | Multiple mutations     |       |       | All mutations          |       |      | Point mutations        |      |      | Multiple mutations     |      |      | All mutations          |      |      |       |
|         |                     | cross-validation level |       |      | cross-validation level |       |       | cross-validation level |       |      | cross-validation level |      |      | cross-validation level |      |      | cross-validation level |      |      |       |
| mut.    | pos.                | prot.                  | mut.  | pos. | prot.                  | mut.  | pos.  | prot.                  | mut.  | pos. | prot.                  | mut. | pos. | prot.                  | mut. | pos. | prot.                  | mut. | pos. | prot. |
| 2LZM    | mGPFusion           | 0.87                   | 0.80  | 0.75 | 0.96                   | 0.83  | 0.64  | 0.90                   | 0.76  | 0.68 | 0.82                   | 1.02 | 1.12 | 0.57                   | 1.53 | 2.14 | 0.76                   | 1.30 | 1.43 |       |
|         | mGPFusion, only B62 | 0.86                   | 0.77  | 0.75 | 0.96                   | 0.87  | 0.64  | 0.90                   | 0.82  | 0.69 | 0.84                   | 1.08 | 1.12 | 0.59                   | 1.16 | 2.11 | 0.79                   | 1.13 | 1.42 |       |
|         | mGP                 | 0.86                   | 0.59  | -    | 0.97                   | 0.85  | -     | 0.90                   | 0.72  | -    | 0.82                   | 1.34 | -    | 0.48                   | 1.24 | -    | 0.75                   | 1.29 | -    |       |
|         | mGP, only B62       | 0.75                   | 0.37  | -    | 0.94                   | 0.77  | -     | 0.82                   | 0.61  | -    | 1.12                   | 1.93 | -    | 0.78                   | 1.44 | -    | 1.05                   | 1.70 | -    |       |
|         | Rosetta scaled      | 0.74                   | 0.73  | -    | 0.68                   | 0.66  | -     | 0.70                   | 0.65  | -    | 1.05                   | 1.06 | -    | 1.65                   | 1.84 | -    | 1.23                   | 1.51 | -    |       |
|         | Rosetta             | 0.75                   |       |      | 0.68                   |       |       | 0.71                   |       |      | 1.13                   |      |      | 1.37                   |      |      |                        |      |      |       |
|         | mCSM                | 0.57                   |       |      | -                      |       |       | -                      |       |      | 1.27                   |      |      | -                      |      |      |                        |      |      |       |
|         | PoPMuSiC            | 0.71                   |       |      | -                      |       |       | -                      |       |      | 1.11                   |      |      | -                      |      |      |                        |      |      |       |
| 1BNI    | mGPFusion           | 0.77                   | 0.64  | 0.62 | 0.86                   | 0.70  | 0.39  | 0.77                   | 0.55  | 0.57 | 1.21                   | 1.37 | 1.69 | 1.28                   | 2.49 | 2.17 | 1.22                   | 1.67 | 1.75 |       |
|         | mGPFusion, only B62 | 0.74                   | 0.61  | 0.62 | 0.84                   | 0.79  | 0.40  | 0.74                   | 0.60  | 0.57 | 1.27                   | 1.45 | 1.69 | 1.24                   | 2.03 | 2.14 | 1.27                   | 1.60 | 1.75 |       |
|         | mGP                 | 0.81                   | 0.65  | -    | 0.86                   | 0.82  | -     | 0.80                   | 0.63  | -    | 1.08                   | 1.40 | -    | 1.32                   | 2.00 | -    | 1.11                   | 1.55 | -    |       |
|         | mGP, only B62       | 0.61                   | 0.48  | -    | 0.87                   | 0.85  | -     | 0.63                   | 0.41  | -    | 1.61                   | 2.32 | -    | 1.15                   | 1.67 | -    | 1.57                   | 2.20 | -    |       |
|         | Rosetta scaled      | 0.59                   | 0.58  | -    | 0.17                   | 0.29  | -     | 0.53                   | 0.45  | -    | 1.58                   | 1.58 | -    | 2.51                   | 2.90 | -    | 1.70                   | 1.94 | -    |       |
|         | Rosetta             | 0.62                   |       |      | 0.18                   |       |       | 0.56                   |       |      | 1.70                   |      |      | 2.33                   |      |      |                        |      |      |       |
|         | mCSM                | 0.60                   |       |      | -                      |       |       | -                      |       |      | 1.62                   |      |      | -                      |      |      |                        |      |      |       |
|         | PoPMuSiC            | 0.66                   |       |      | -                      |       |       | -                      |       |      | 1.53                   |      |      | -                      |      |      |                        |      |      |       |
| 1VQB    | mGPFusion           | 0.67                   | 0.50  | 0.49 | 0.93                   | 0.83  | 0.75  | 0.76                   | 0.69  | 0.60 | 1.71                   | 1.94 | 2.25 | 1.15                   | 1.62 | 2.06 | 1.59                   | 1.82 | 2.20 |       |
|         | mGPFusion, only B62 | 0.65                   | 0.53  | 0.50 | 0.91                   | 0.82  | 0.73  | 0.75                   | 0.69  | 0.58 | 1.75                   | 1.94 | 2.25 | 1.35                   | 1.82 | 2.43 | 1.66                   | 1.89 | 2.30 |       |
|         | mGP                 | 0.79                   | 0.12  | -    | 0.96                   | 0.70  | -     | 0.85                   | 0.50  | -    | 1.41                   | 2.41 | -    | 0.70                   | 1.97 | -    | 1.27                   | 2.24 | -    |       |
|         | mGP, only B62       | 0.79                   | 0.29  | -    | 0.97                   | 0.75  | -     | 0.85                   | 0.55  | -    | 1.50                   | 2.89 | -    | 0.63                   | 2.30 | -    | 1.33                   | 2.66 | -    |       |
|         | Rosetta scaled      | 0.47                   | 0.46  | -    | 0.71                   | 0.68  | -     | 0.57                   | 0.59  | -    | 1.99                   | 2.00 | -    | 1.90                   | 1.96 | -    | 1.97                   | 1.99 | -    |       |
|         | Rosetta             | 0.49                   |       |      | 0.73                   |       |       | 0.59                   |       |      | 2.26                   |      |      | 2.06                   |      |      |                        |      |      |       |
|         | mCSM                | 0.53                   |       |      | -                      |       |       | -                      |       |      | 2.24                   |      |      | -                      |      |      |                        |      |      |       |
|         | PoPMuSiC            | 0.51                   |       |      | -                      |       |       | -                      |       |      | 2.29                   |      |      | -                      |      |      |                        |      |      |       |
| 1LZI    | mGPFusion           | 0.75                   | 0.59  | 0.58 | 1.00                   | 0.11  | -1.00 | 0.77                   | 0.57  | 0.52 | 0.83                   | 0.99 | 1.06 | 0.56                   | 2.40 | 3.75 | 0.83                   | 1.07 | 1.16 |       |
|         | mGPFusion, only B62 | 0.73                   | 0.56  | 0.59 | 1.00                   | 0.05  | -1.00 | 0.76                   | 0.56  | 0.53 | 0.86                   | 1.03 | 1.06 | 1.10                   | 2.41 | 3.51 | 0.87                   | 1.10 | 1.14 |       |
|         | mGP                 | 0.75                   | 0.39  | -    | 1.00                   | 0.56  | -     | 0.78                   | 0.47  | -    | 0.81                   | 1.15 | -    | 0.13                   | 1.65 | -    | 0.80                   | 1.17 | -    |       |
|         | mGP, only B62       | 0.71                   | -0.31 | -    | 1.00                   | 0.42  | -     | 0.74                   | 0.21  | -    | 0.91                   | 1.43 | -    | 0.27                   | 2.36 | -    | 0.90                   | 1.47 | -    |       |
|         | Rosetta scaled      | 0.57                   | 0.55  | -    | -1.00                  | -1.00 | -     | 0.53                   | 0.46  | -    | 0.99                   | 1.01 | -    | 3.23                   | 3.25 | -    | 1.07                   | 1.15 | -    |       |
|         | Rosetta             | 0.59                   |       |      | -1.00                  |       |       | 0.55                   |       |      | 1.04                   |      |      | 3.41                   |      |      |                        |      |      |       |
|         | mCSM                | 0.67                   |       |      | -                      |       |       | -                      |       |      | 0.97                   |      |      | -                      |      |      |                        |      |      |       |
|         | PoPMuSiC            | 0.64                   |       |      | -                      |       |       | -                      |       |      | 0.95                   |      |      | -                      |      |      |                        |      |      |       |
| 2CI2    | mGPFusion           | 0.73                   | 0.72  | 0.64 | 0.95                   | 0.87  | 0.85  | 0.82                   | 0.81  | 0.71 | 0.85                   | 0.90 | 1.07 | 0.55                   | 0.80 | 1.21 | 0.80                   | 0.86 | 1.10 |       |
|         | mGPFusion, only B62 | 0.69                   | 0.67  | 0.63 | 0.92                   | 0.86  | 0.86  | 0.79                   | 0.79  | 0.72 | 0.91                   | 0.97 | 1.07 | 0.71                   | 1.01 | 1.12 | 0.87                   | 0.99 | 1.08 |       |
|         | mGP                 | 0.65                   | 0.61  | -    | 0.92                   | 0.79  | -     | 0.76                   | 0.72  | -    | 0.95                   | 1.02 | -    | 0.66                   | 1.01 | -    | 0.90                   | 1.02 | -    |       |
|         | mGP, only B62       | 0.51                   | 0.74  | -    | 0.92                   | 0.71  | -     | 0.68                   | 0.63  | -    | 1.16                   | 1.39 | -    | 0.71                   | 1.40 | -    | 1.08                   | 1.39 | -    |       |
|         | Rosetta scaled      | 0.60                   | 0.60  | -    | 0.61                   | 0.61  | -     | 0.63                   | 0.63  | -    | 1.00                   | 1.00 | -    | 1.27                   | 1.27 | -    | 1.06                   | 1.11 | -    |       |
|         | Rosetta             | 0.63                   |       |      | 0.62                   |       |       | 0.65                   |       |      | 1.09                   |      |      | 1.30                   |      |      |                        |      |      |       |
|         | mCSM                | 0.74                   |       |      | -                      |       |       | -                      |       |      | 0.86                   |      |      | -                      |      |      |                        |      |      |       |
|         | PoPMuSiC            | 0.75                   |       |      | -                      |       |       | -                      |       |      | 0.85                   |      |      | -                      |      |      |                        |      |      |       |
| 1PGA    | mGPFusion           | 0.68                   | 0.47  | 0.69 | 0.90                   | 0.35  | 0.32  | 0.85                   | 0.43  | 0.50 | 1.26                   | 1.54 | 1.64 | 0.53                   | 2.09 | 2.74 | 0.88                   | 2.00 | 2.38 |       |
|         | mGPFusion, only B62 | 0.82                   | 0.59  | 0.71 | 0.76                   | 0.60  | 0.62  | 0.81                   | 0.53  | 0.70 | 0.87                   | 1.22 | 1.06 | 0.69                   | 0.95 | 0.88 | 0.83                   | 1.13 | 1.02 |       |
|         | mGP                 | 0.62                   | 0.61  | -    | 0.93                   | -0.24 | -     | 0.84                   | -0.14 | -    | 1.40                   | 1.58 | -    | 0.45                   | 3.01 | -    | 0.94                   | 2.81 | -    |       |
|         | mGP, only B62       | 0.57                   | -0.46 | -    | 0.92                   | -0.08 | -     | 0.81                   | 0.06  | -    | 1.53                   | 1.73 | -    | 0.47                   | 2.07 | -    | 1.02                   | 2.01 | -    |       |
|         | Rosetta scaled      | 0.69                   | 0.59  | -    | 0.09                   | 0.07  | -     | 0.24                   | 0.11  | -    | 1.21                   | 1.42 | -    | 2.81                   | 3.09 | -    | 2.33                   | 2.87 | -    |       |
|         | Rosetta             | 0.69                   |       |      | 0.03                   |       |       | 0.28                   |       |      | 1.70                   |      |      | 3.51                   |      |      |                        |      |      |       |
|         | mCSM                | -0.10                  |       |      | -                      |       |       | -                      |       |      | 1.94                   |      |      | -                      |      |      |                        |      |      |       |
|         | PoPMuSiC            | 0.28                   |       |      | -                      |       |       | -                      |       |      | 1.89                   |      |      | -                      |      |      |                        |      |      |       |
| 2RN2    | mGPFusion           | 0.79                   | 0.58  | 0.71 | 0.78                   | 0.60  | 0.61  | 0.79                   | 0.53  | 0.70 | 0.91                   | 1.21 | 1.05 | 0.67                   | 1.01 | 0.91 | 0.86                   | 1.14 | 1.02 |       |
|         | mGPFusion, only B62 | 0.82                   | 0.59  | 0.71 | 0.76                   | 0.60  | 0.62  | 0.81                   | 0.53  | 0.70 | 0.87                   | 1.22 | 1.59 | 0.69                   | 0.95 | 1.18 | 0.83                   | 1.13 | 1.51 |       |
|         | mGP                 | 0.77                   | 0.12  | -    | 0.75                   | 0.42  | -     | 0.77                   | 0.22  | -    | 0.93                   | 1.45 | -    | 0.74                   | 1.21 | -    | 0.89                   | 1.36 | -    |       |
|         | mGP, only B62       | 0.83                   | 0.09  | -    | 0.77                   | 0.42  | -     | 0.82                   | 0.23  | -    | 0.82                   | 1.45 | -    | 0.68                   | 1.20 | -    | 0.80                   | 1.36 | -    |       |
|         | Rosetta scaled      | 0.66                   | 0.64  | -    | 0.48                   | 0.50  | -     | 0.62                   | 0.57  | -    | 1.09                   | 1.13 | -    | 1.20                   | 1.08 | -    | 1.12                   | 1.11 | -    |       |
|         | Rosetta             | 0.70                   |       |      | 0.47                   |       |       | 0.65                   |       |      | 1.07                   |      |      | 1.25                   |      |      |                        |      |      |       |
|         | mCSM                | 0.71                   |       |      | -                      |       |       | -                      |       |      | 1.04                   |      |      | -                      |      |      |                        |      |      |       |
|         | PoPMuSiC            | 0.71                   |       |      | -                      |       |       | -                      |       |      | 1.16                   |      |      | -                      |      |      |                        |      |      |       |
| 1CSP    | mGPFusion           | 0.85                   | 0.23  | 0.33 | 0.92                   | 0.73  | 0.48  | 0.92                   | 0.75  | 0.38 | 0.64                   | 1.04 | 1.10 | 0.91                   | 1.66 | 2.58 | 0.75                   | 1.45 | 1.80 |       |
|         | mGPFusion, only B62 | 0.86                   | 0.22  | 0.34 | 0.91                   | 0.69  | 0.59  | 0.91                   | 0.72  | 0.54 | 0.65                   | 1.04 | 1.10 | 0.96                   | 1.87 | 2.13 | 0.78                   | 1.60 | 1.57 |       |
|         | mGP                 | 0.88                   | -0.06 | -    | 0.94                   | 0.75  | -     | 0.94                   | 0.77  | -    | 0.54                   | 1.07 | -    | 0.76                   | 1.51 | -    | 0.63                   | 1.36 | -    |       |
|         | mGP, only B62       | 0.87                   | -0.37 | -    | 0.92                   | 0.71  | -     | 0.92                   | 0.72  | -    | 0.60                   | 1.12 | -    | 0.86                   | 1.59 | -    | 0.71                   | 1.43 | -    |       |
|         | Rosetta scaled      | 0.23                   | 0.20  | -    | 0.68                   | 0.69  | -     | 0.59                   | 0.64  | -    | 1.04                   | 1.06 | -    | 2.19                   | 2.29 | -    | 1.58                   | 1.92 | -    |       |
|         | Rosetta             | 0.33                   |       |      | 0.68                   |       |       | 0.60                   |       |      | 1.11                   |      |      | 1.92                   |      |      |                        |      |      |       |
|         | mCSM                | 0.42                   |       |      | -                      |       |       | -                      |       |      | 1.02                   |      |      | -                      |      |      |                        |      |      |       |
|         | PoPMuSiC            | 0.48                   |       |      | -                      |       |       | -                      |       |      | 0.99                   |      |      | -                      |      |      |                        |      |      |       |



Table S3. Comparison of different methods on the 15 protein dataset with respect to  $\rho$  and  $rmse$  after removing 10% of predictions with largest errors. Mutation, position, and protein are referred to as mut., pos., and prot., respectively. Off-the-shelf implementations of Rosetta, mCSM and PoPMuSiC are used directly without cross-validation.

| Results after 10 %<br>outlier removal                  | Correlation $\rho$     |      |       |                        |      |       |                        |      |       | rmse                   |      |       |                        |      |       |                        |      |       |
|--------------------------------------------------------|------------------------|------|-------|------------------------|------|-------|------------------------|------|-------|------------------------|------|-------|------------------------|------|-------|------------------------|------|-------|
|                                                        | Point mutations        |      |       | Multiple mutations     |      |       | All mutations          |      |       | Point mutations        |      |       | Multiple mutations     |      |       | All mutations          |      |       |
|                                                        | cross-validation level |      |       | cross-validation level |      |       | cross-validation level |      |       | cross-validation level |      |       | cross-validation level |      |       | cross-validation level |      |       |
| Method                                                 | mut.                   | pos. | prot. |
| mGPfusion                                              | 0.87                   | 0.77 | 0.75  | 0.97                   | 0.84 | 0.63  | 0.92                   | 0.81 | 0.71  | 0.69                   | 0.85 | 0.93  | 0.62                   | 1.55 | 1.90  | 0.67                   | 1.15 | 1.13  |
| mGPfusion, only B62                                    | 0.86                   | 0.73 | 0.75  | 0.96                   | 0.84 | 0.65  | 0.91                   | 0.80 | 0.72  | 0.69                   | 0.85 | 0.93  | 0.64                   | 1.43 | 1.85  | 0.67                   | 1.10 | 1.12  |
| mGP                                                    | 0.89                   | 0.57 | -     | 0.98                   | 0.76 | -     | 0.93                   | 0.74 | -     | 0.65                   | 1.01 | -     | 0.49                   | 1.66 | -     | 0.62                   | 1.23 | -     |
| mGP, only B62                                          | 0.86                   | 0.27 | -     | 0.97                   | 0.76 | -     | 0.91                   | 0.66 | -     | 0.73                   | 1.30 | -     | 0.54                   | 1.48 | -     | 0.69                   | 1.37 | -     |
| Rosetta scaled                                         | 0.80                   | 0.78 | -     | 0.73                   | 0.71 | -     | 0.78                   | 0.75 | -     | 0.84                   | 0.87 | -     | 1.67                   | 1.99 | -     | 1.00                   | 1.31 | -     |
| Off-the-shelf implementations with no cross-validation |                        |      |       |                        |      |       |                        |      |       |                        |      |       |                        |      |       |                        |      |       |
| Rosetta                                                | 0.75                   |      |       | 0.67                   |      |       | 0.73                   |      |       | 0.94                   |      |       | 1.85                   |      |       | 1.11                   |      |       |
| mCSM                                                   | 0.71                   |      |       | -                      |      |       | -                      |      |       | 0.89                   |      |       | -                      |      |       | -                      |      |       |
| PoPMuSiC                                               | 0.73                   |      |       | -                      |      |       | -                      |      |       | 0.86                   |      |       | -                      |      |       | -                      |      |       |

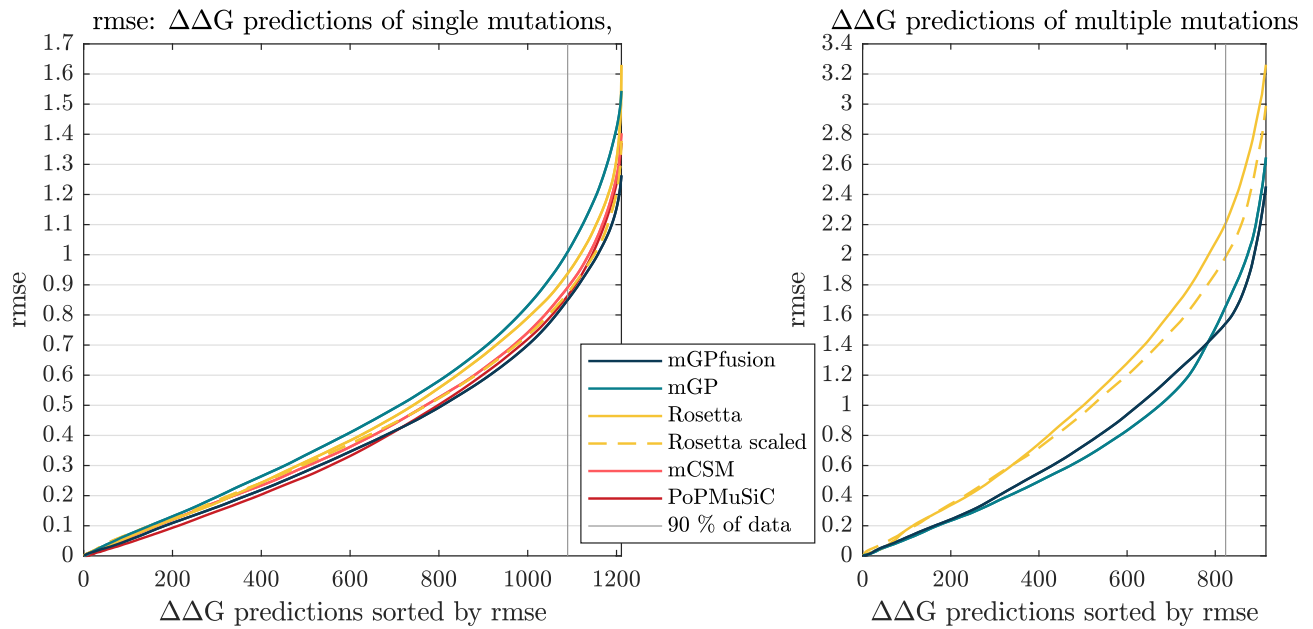

Fig. S5. rmse with different amount of predictions, when predictions are sorted by the error. Position level cross-validation was used for mGPfusion, mGP and Rosetta scaled.

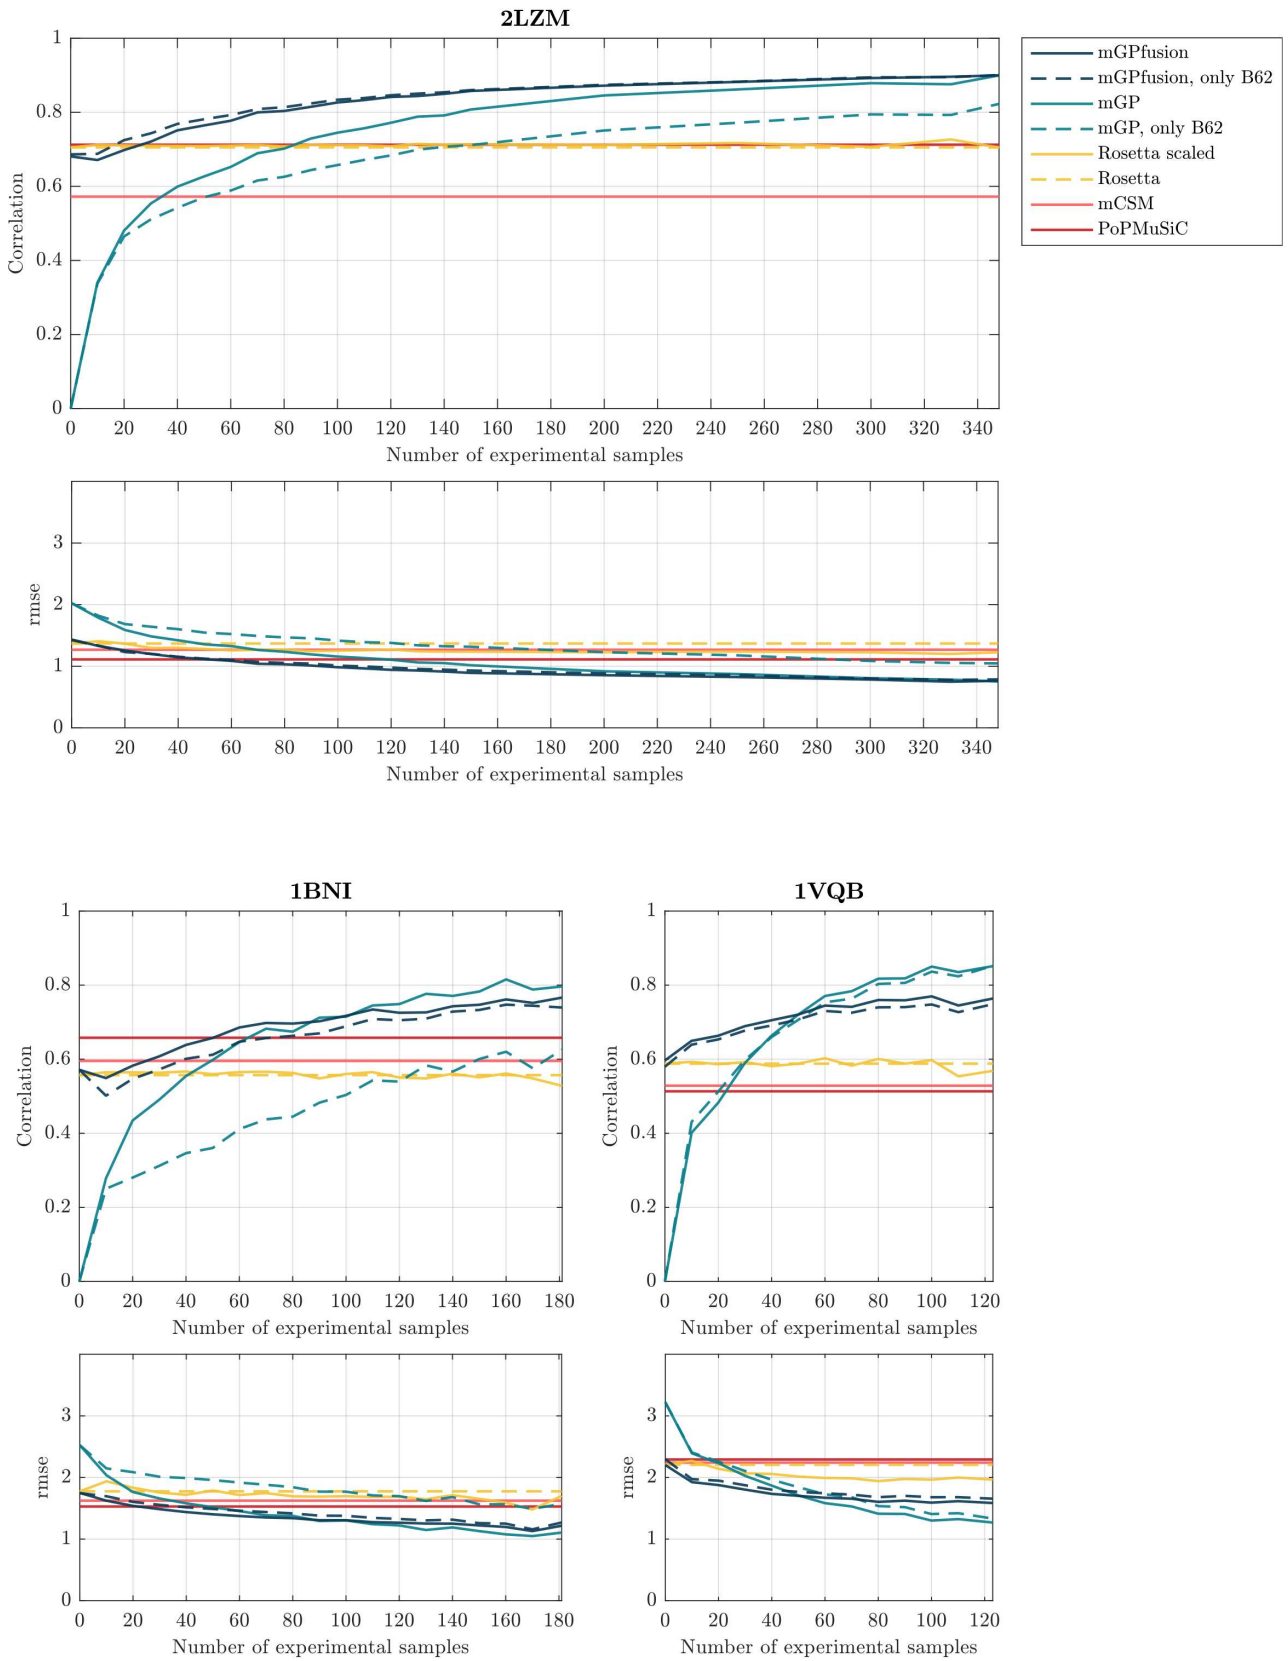

Fig. S6. Learning curves.



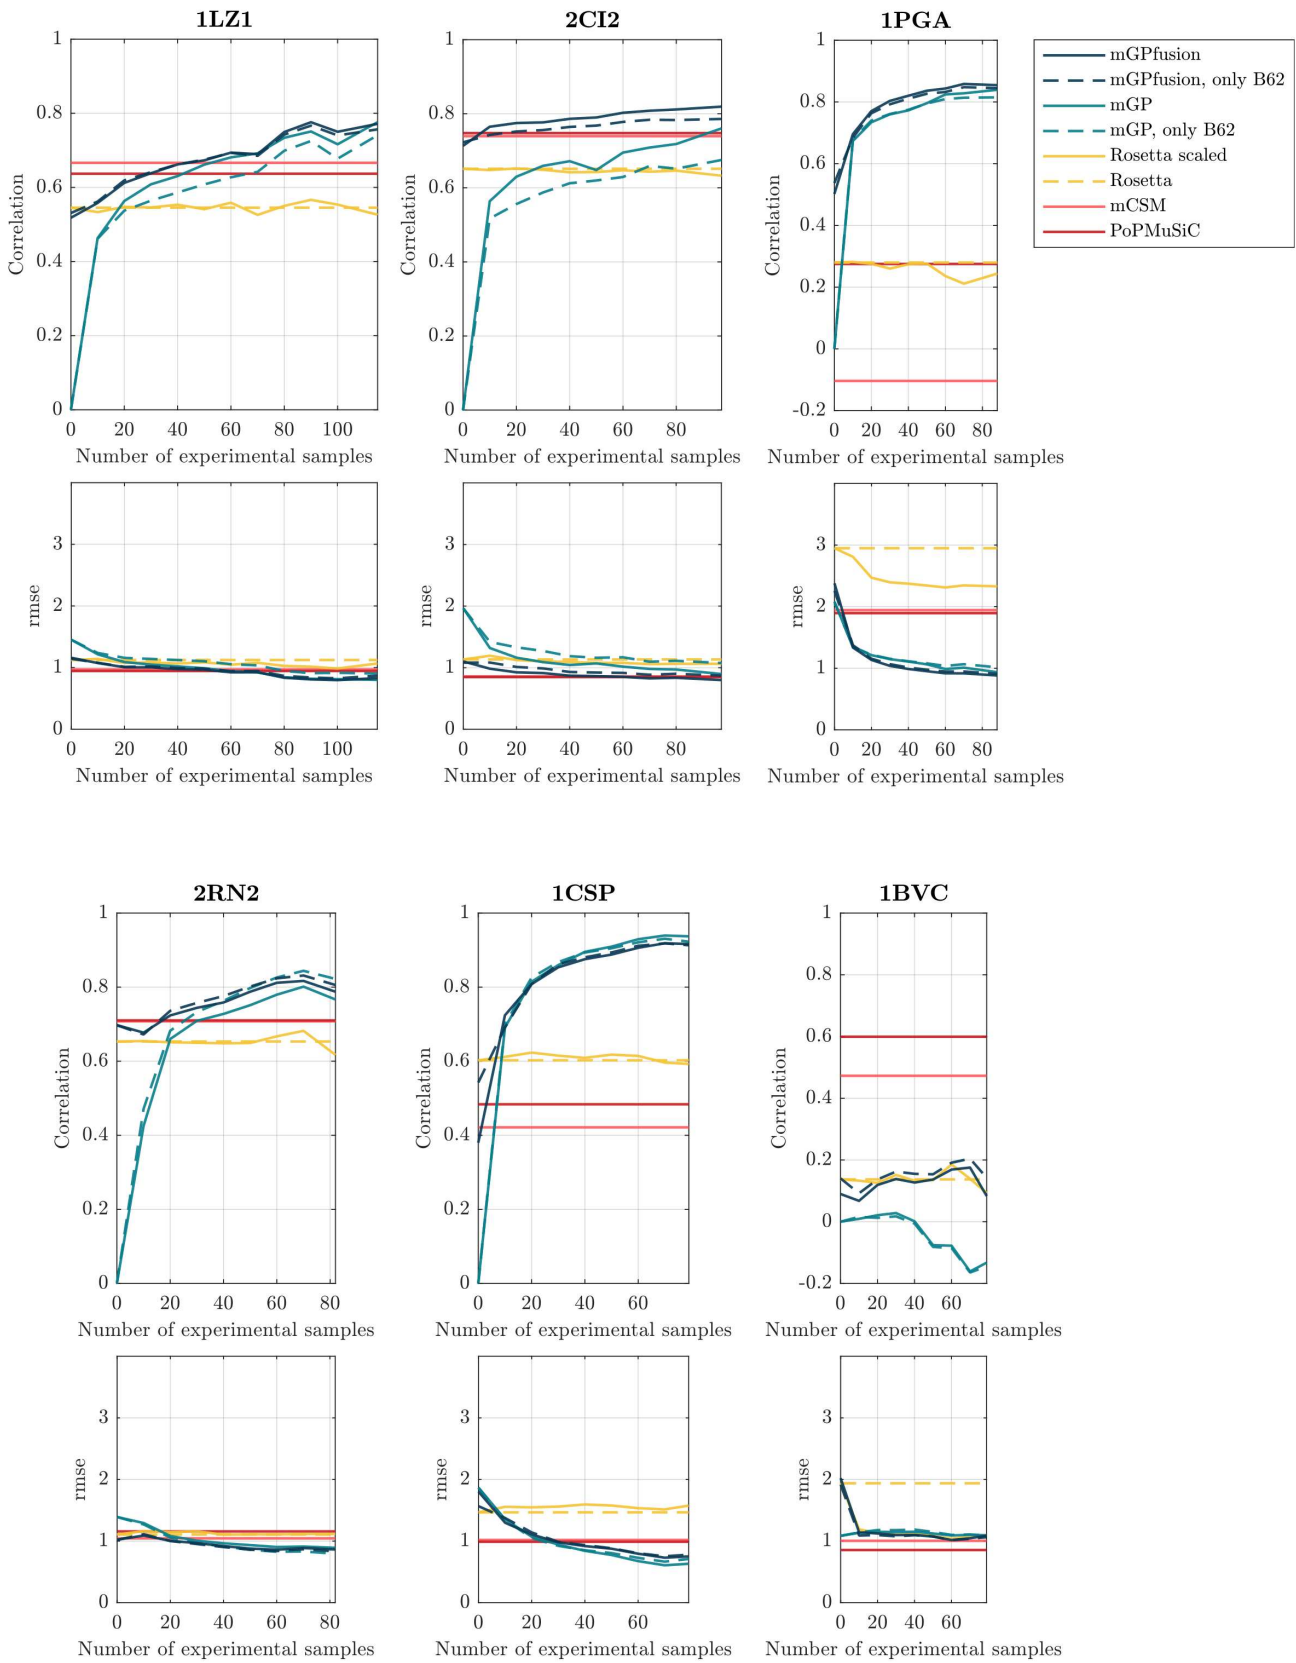

Fig. S7. Learning curves.

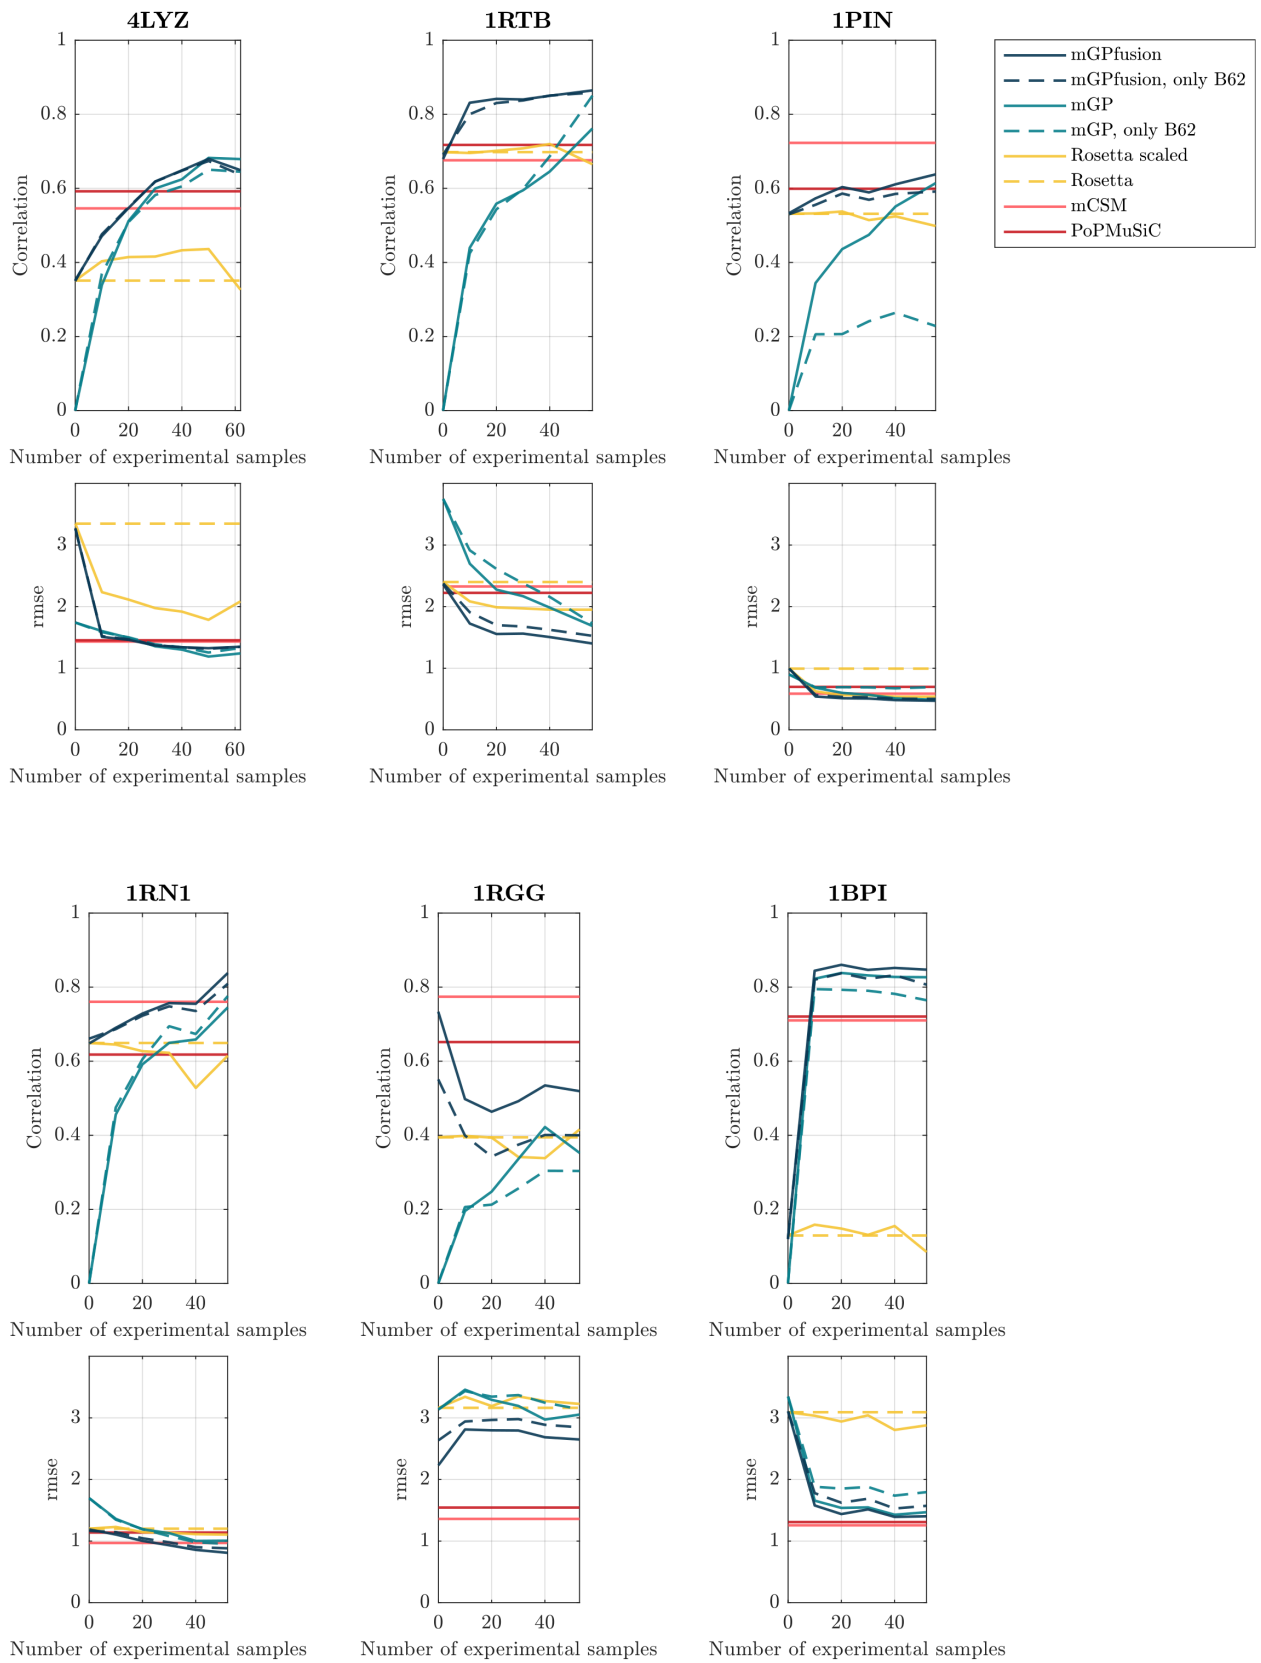

Fig. S8. Learning curves.

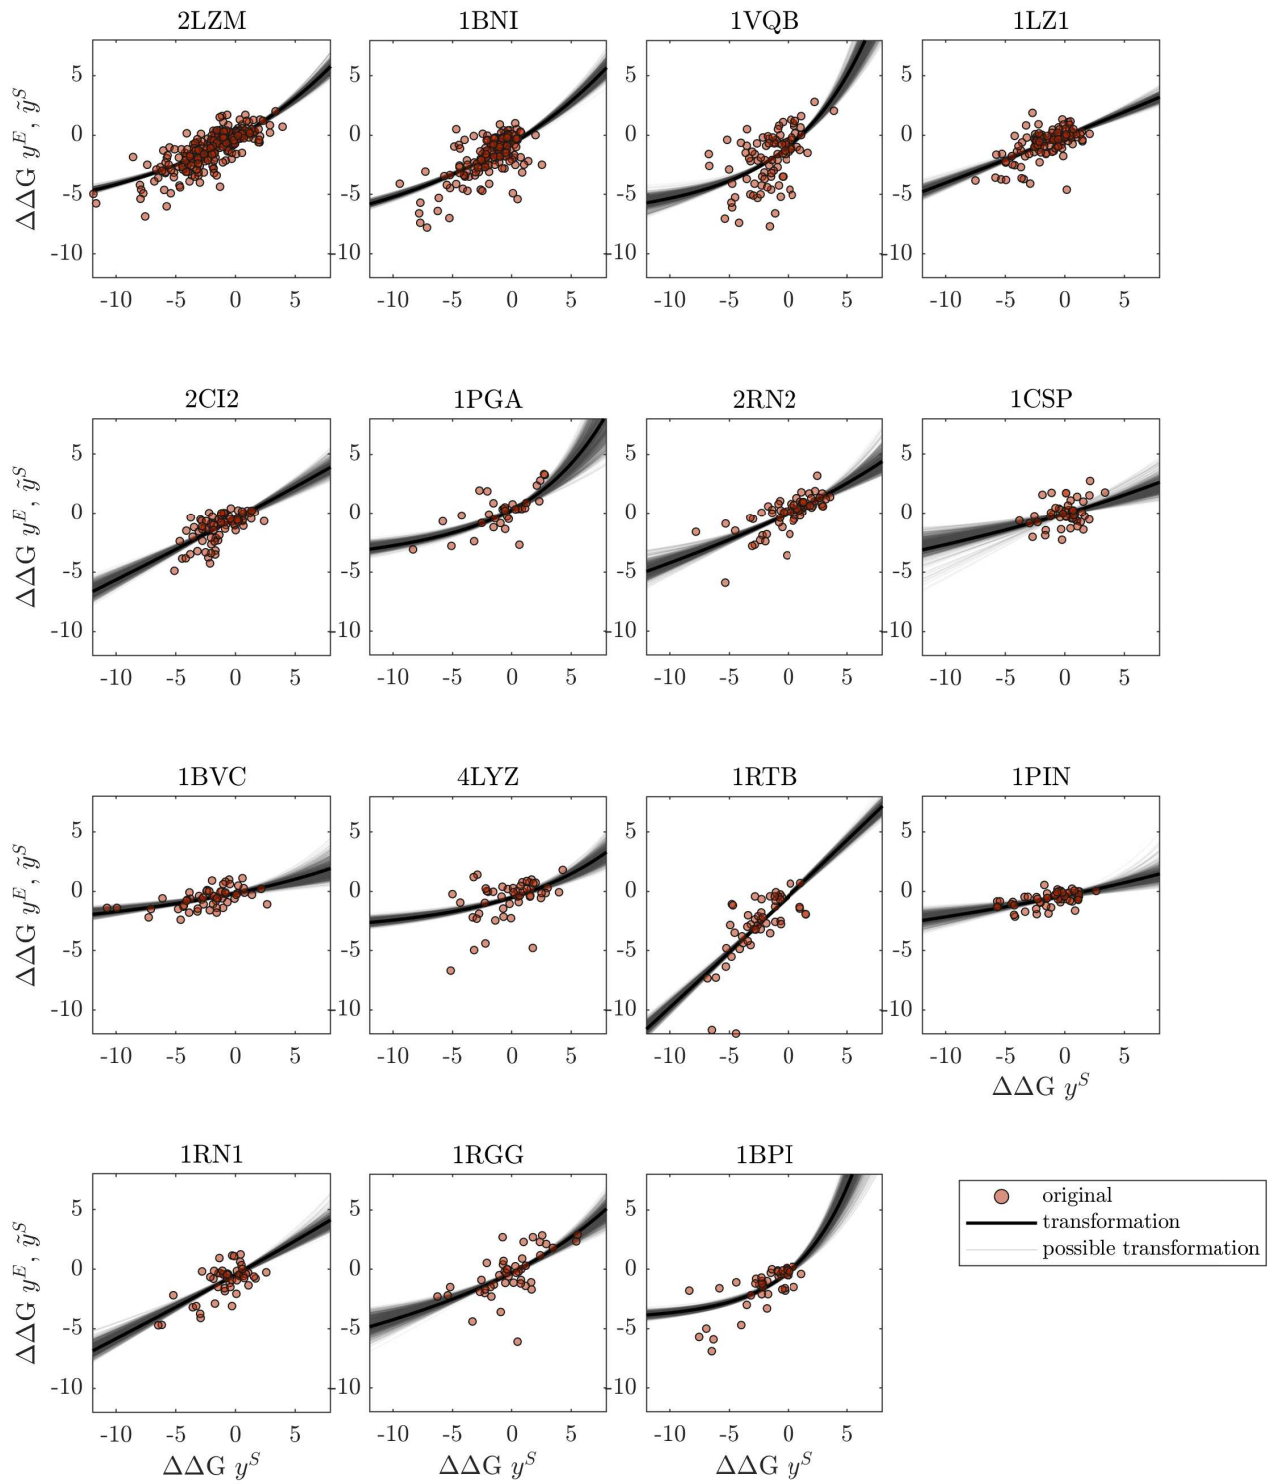

**Fig. S9.** Transformations for all 15 proteins presented in Table 1. The red circles mark the simulated  $\Delta\Delta G$ -values  $y^S$  with respect to the experimental measured  $\Delta\Delta G$ -values  $y^E$ . Thin black lines show possible transformations for  $y^S$ , whereas the thick black line shows the selected transformation from  $y^S$  to  $\tilde{y}^S$ .
